# Supplementary material for: Theoretical research on the effect of regulated π-conjugation on the photophysical properties of Ir(iii) complexes
Source: Royal Society of Chemistry journal article supplement (doi:10.1039/c5cp00211g), 2015-01-01
Supplement: c5cp00211g1.pdf [file c5cp00211g1.pdf]

# **Theoretical Research on the Effect of Regulated $\pi$ -conjugation on Photophysical Properties of Ir(III) Complexes**

Li-Ming Xie, Fu-Quan Bai\*, Wei Li, Zhi-Xiang Zhang, Hong-Xing Zhang\*

State Key Laboratory of Theoretical and Computational Chemistry, Institute of Theoretical Chemistry, Jilin University, Changchun 130023, People's Republic of China

\*E-mail: baifq@jlu.edu.cn; zhanghx@mail.jlu.edu.cn

Table S11. Molecular orbital compositions in the ground states for complexes **A-D**

| Complex  | Orbital | MO composition (%) |                 |                 |                 |
|----------|---------|--------------------|-----------------|-----------------|-----------------|
|          |         | Ir                 | C <sup>N1</sup> | C <sup>C*</sup> | C <sup>N2</sup> |
| <b>A</b> | L+5     | 3                  | 2               | 94              | 1               |
|          | L       | 2                  | 82              | 1               | 14              |
|          | H       | 38                 | 25              | 5               | 32              |
|          | H-2     | 2                  | 48              | 18              | 33              |
|          | H-9     | 20                 | 7               | 35              | 37              |
| <b>B</b> | L+3     | 3                  | 65              | 18              | 15              |
|          | L       | 2                  | 14              | 1               | 82              |
|          | H       | 39                 | 30              | 6               | 24              |
|          | H-2     | 2                  | 35              | 16              | 47              |
|          | H-3     | 26                 | 13              | 54              | 7               |
|          | H-6     | 9                  | 17              | 21              | 53              |
| <b>C</b> | L+1     | 2                  | 95              | 1               | 2               |
|          | L       | 2                  | 2               | 1               | 95              |
|          | H       | 33                 | 37              | 4               | 26              |
|          | H-2     | 4                  | 33              | 16              | 47              |
|          | H-3     | 31                 | 23              | 34              | 12              |
| <b>D</b> | L+2     | 1                  | 30              | 1               | 68              |
|          | L       | 3                  | 12              | 1               | 85              |
|          | H       | 38                 | 32              | 4               | 25              |
|          | H-4     | 14                 | 30              | 37              | 19              |
|          | H-8     | 9                  | 30              | 46              | 15              |
|          | H-10    | 5                  | 29              | 17              | 49              |

Table SI2. Molecular orbital compositions in the lowest-lying triplet states for **A-D**

| Complexes | Orbital | MO composition (%) |                 |                 |                 |
|-----------|---------|--------------------|-----------------|-----------------|-----------------|
|           |         | Ir                 | C <sup>N1</sup> | C <sup>C*</sup> | C <sup>N2</sup> |
| <b>A</b>  | L       | 2                  | 2               | 1               | 94              |
|           | H       | 27                 | 23              | 4               | 47              |
|           | H-1     | 4                  | 39              | 15              | 42              |
| <b>B</b>  | L       | 2                  | 2               | 1               | 95              |
|           | H       | 27                 | 21              | 5               | 48              |
|           | H-1     | 6                  | 39              | 26              | 30              |
|           | H-2     | 12                 | 9               | 64              | 16              |
| <b>C</b>  | L       | 2                  | 70              | 1               | 27              |
|           | H       | 22                 | 57              | 4               | 17              |
|           | H-1     | 10                 | 37              | 11              | 42              |
| <b>D</b>  | L       | 2                  | 82              | 1               | 15              |
|           | H       | 25                 | 56              | 4               | 15              |
|           | H-1     | 26                 | 27              | 32              | 15              |

Table S13. The main transitions, oscillator strengths and vertical excitation energy of complex **A**

| States         | oscillator strength | Energy(eV) | Transition (CI)                                                |
|----------------|---------------------|------------|----------------------------------------------------------------|
| T <sub>1</sub> | -                   | 2.4846     | H-L (0.61)<br>H-1-L(0.27)                                      |
| T <sub>2</sub> | -                   | 3.3150     | H-L+1(0.40)<br>H-1-L+1(0.35)<br>H-5-L+1(0.29)<br>H-2-L+1(0.20) |
| S <sup>1</sup> | 0.1750              | 3.3168     | H-L(0.68)                                                      |
| S <sub>2</sub> | 0.0626              | 3.8660     | H-L+1(0.60)<br>H-1-L+1(0.23)                                   |
| S <sub>3</sub> | 0.0284              | 3.9724     | H-1-L(0.52)<br>H-5-L(0.20)                                     |
| S <sub>4</sub> | 0.0211              | 4.1467     | H-2-L(0.54)<br>H-1-L(0.24)<br>H-4-L(0.23)                      |
| S <sub>5</sub> | 0.1038              | 4.2706     | H-3-L(0.60)                                                    |
| S <sub>6</sub> | 0.0655              | 4.4249     | H-4-L(0.34)                                                    |
| S <sub>7</sub> | 0.0429              | 4.4634     | H-1-L+1(0.57)<br>H-L+1(0.22)                                   |
| S <sub>8</sub> | 0.1761              | 4.5516     | H-2-L+1(0.36)<br>H-1-L+1(0.26)<br>H-4-L(0.24)                  |
| S <sub>9</sub> | 0.1012              | 4.5636     | H-2-L+1(0.31)<br>H-4-L(0.26)                                   |

Table S14. The main transitions, oscillator strengths and vertical excitation energy of complex **B**

| States          | oscillator strength | Energy(eV) | Transition (CI)                                                |
|-----------------|---------------------|------------|----------------------------------------------------------------|
| T <sub>1</sub>  | -                   | 2.4795     | H-L(0.61)<br>H-1-L(0.20)<br>H-2-L(0.20)                        |
| T <sub>2</sub>  | -                   | 3.3301     | H-L+1(0.37)<br>H-1-L+1(0.34)<br>H-2-L+1(0.24)<br>H-5-L+1(0.23) |
| S <sub>1</sub>  | 0.1666              | 3.3284     | H-L(0.68)                                                      |
| S <sub>2</sub>  | 0.0527              | 3.9030     | H-L+1(0.56)<br>H-1-L+1(0.22)<br>H-1-L(0.24)                    |
| S <sub>3</sub>  | 0.0248              | 3.9665     | H-1-L(0.48)<br>H-3-L(0.23)<br>H-L+1(0.22)                      |
| S <sub>4</sub>  | 0.0116              | 4.1777     | H-2-L(0.51)<br>H-4-L(0.24)<br>H-3-L(0.21)                      |
| S <sub>5</sub>  | 0.1867              | 4.3080     | H-3-L(0.46)<br>H-4-L(0.38)<br>H-1-L(0.26)                      |
| S <sub>7</sub>  | 0.0512              | 4.4640     | H-1-L+1(0.54)<br>H-L+1(0.24)                                   |
| S <sub>8</sub>  | 0.1117              | 4.4942     | H-5-L(0.20)                                                    |
| S <sub>9</sub>  | 0.1053              | 4.5805     | H-2-L+1(0.41)<br>H-3-L+1(0.32)<br>H-4-L+1(0.22)                |
| S <sub>10</sub> | 0.0929              | 4.6042     | H-5-L(0.24)<br>H-4-L(0.20)                                     |

Table SI5. The main transitions, oscillator, strengths and vertical excitation energy of complex C

| States          | oscillator strength | Energy(eV) | Transition (CI)                                        |
|-----------------|---------------------|------------|--------------------------------------------------------|
| T <sub>1</sub>  | -                   | 2.6549     | H-L(0.56)<br>H-1-L(0.29)                               |
| T <sub>2</sub>  | -                   | 3.2655     | H-L(0.32)<br>H-3-L(0.30)<br>H-2-L(0.24)<br>H-L+2(0.21) |
| S <sub>1</sub>  | 0.1307              | 3.3008     | H-L(0.66)                                              |
| S <sub>3</sub>  | 0.0007              | 3.9589     | H-L+2(0.39)<br>H-2-L(0.32)<br>H-3-L(0.23)              |
| S <sub>4</sub>  | 0.4534              | 4.1112     | H-L+2(0.47)<br>H-1-L(0.30)<br>H-2-L(0.29)              |
| S <sub>5</sub>  | 0.0112              | 4.1563     | H-2-L(0.39)<br>H-1-L(0.27)                             |
| S <sub>6</sub>  | 0.0495              | 4.1883     | H-1-L(0.33)                                            |
| S <sub>8</sub>  | 0.0297              | 4.3232     | H-3-L(0.49)<br>H-1-L(0.23)                             |
| S <sub>10</sub> | 0.0189              | 4.4596     | H-5-L(0.56)<br>H-4-L(0.21)                             |

Table SI6. The main transitions, oscillator strengths and vertical excitation energy of complex **D**

| States          | oscillator strength | Energy(eV) | Transition (CI)                                 |
|-----------------|---------------------|------------|-------------------------------------------------|
| T <sub>1</sub>  | -                   | 2.4938     | H-L(0.57)<br>H-2-L(0.23)                        |
| T <sub>2</sub>  | -                   | 3.2610     | H-L+1(0.36)<br>H-2-L+1(0.34)<br>H-5-L+1(0.22)   |
| S <sub>1</sub>  | 0.2225              | 3.2380     | H-L(0.68)                                       |
| S <sub>2</sub>  | 0.1095              | 3.7326     | H-L+1(0.61)<br>H-2-L+1(0.22)                    |
| S <sub>3</sub>  | 0.1685              | 3.9481     | H-1-L(0.60)<br>H-3-L(0.22)                      |
| S <sub>4</sub>  | 0.0710              | 4.1123     | H-2-L(0.61)                                     |
| S <sub>5</sub>  | 0.0052              | 4.2065     | H-3-L(0.44)<br>H-4-L(0.23)<br>H-1-L(0.21)       |
| S <sub>6</sub>  | 0.0982              | 4.2501     | H-3-L(0.39)                                     |
| S <sub>7</sub>  | 0.1000              | 4.3035     | H-2-L+1(0.45)<br>H-3-L+1(0.29)<br>H-4-L+1(0.23) |
| S <sub>8</sub>  | 0.0207              | 4.3438     | H-1-L+1(0.62)                                   |
| S <sub>9</sub>  | 0.0862              | 4.4132     | H-3-L+1(0.32)                                   |
| S <sub>10</sub> | 0.3344              | 4.4703     | H-4-L(0.51)                                     |

## Table of Contents Image

---

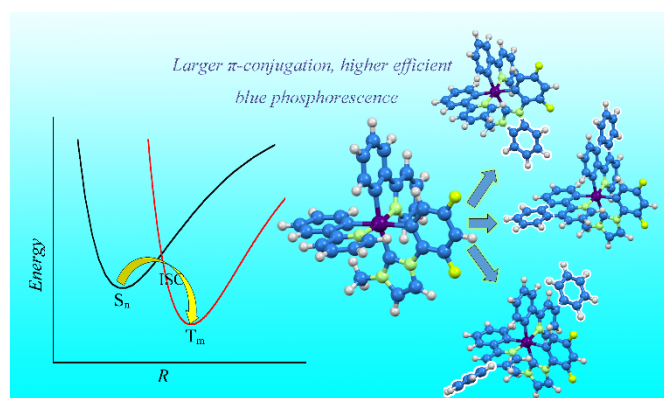

Larger  $\pi$ -skeleton-conjugation in host ligands of Ir(III) carbene complexes can attain remarkably blue-shifted emission and effectively improve the quantum efficiency.
